# Supplementary material for: New perspectives for natural antimicrobial peptides: application as antinflammatory drugs in a murine model
Source: PubMed Central journal article supplement (PMC3526545; doi:10.1186/1471-2172-13-61), 2012-11-17

Figure S1

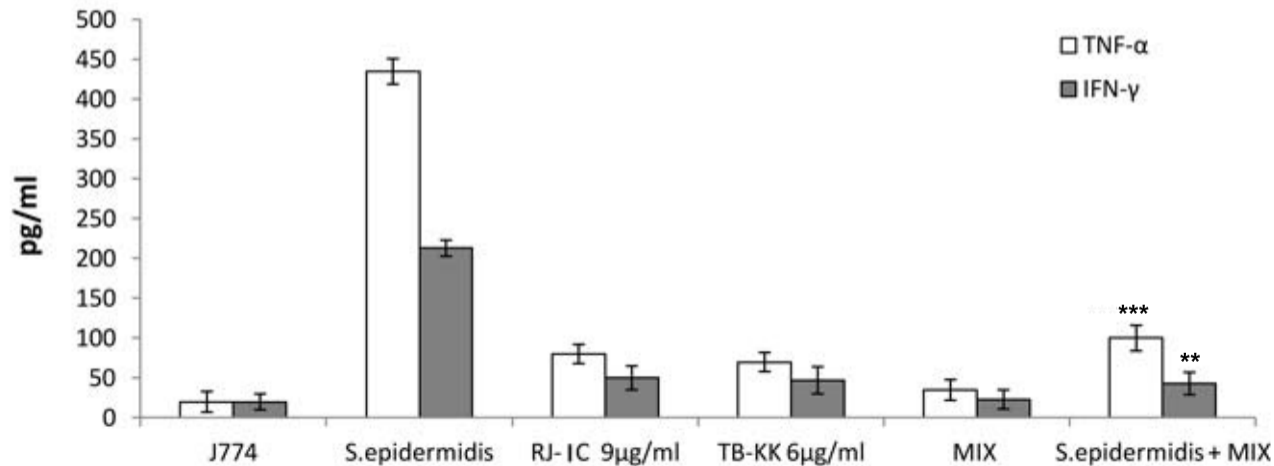

Supplement: 1471-2172-13-61-S2.pdf [file 1471-2172-13-61-S2.pdf]
